# Supplementary material
Source: PubMed Central journal article supplement (PMC9950287)
Supplement: NIHMS1819154-supplement-Supplemental_Digital_Content_1.pdf [file NIHMS1819154-supplement-Supplemental_Digital_Content_1.pdf]

## Supplemental Figure 1. Comparison of letter-acuity scores between anti-NMDAR and HC.

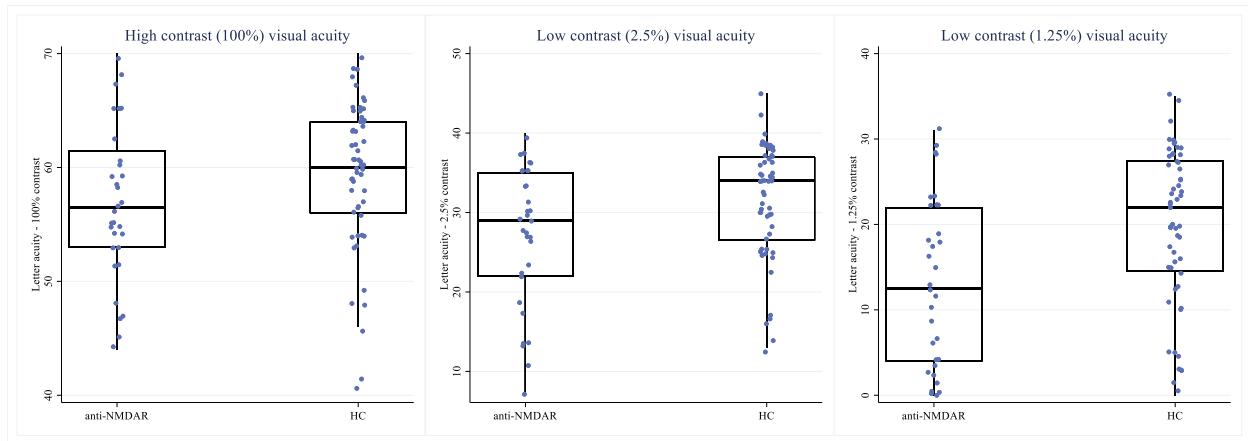

Boxplots demonstrating differences in A. HCLA (100% contrast), B. 2.5% contrast LCLA and C. 1.25% contrast LCLA scores between anti-NMDAR and HC. Statistically significant differences designated as: \* when  $p < 0.05$ .
