# Supplementary material
Source: PubMed Central journal article supplement (PMC9950287)
Supplement: NIHMS1819154-supplement-Supplemental_Digital_Content_2.pdf [file NIHMS1819154-supplement-Supplemental_Digital_Content_2.pdf]

**Supplemental Figure 2. Comparison of OCT measured retinal layer thicknesses between anti-NMDAR and HC.**

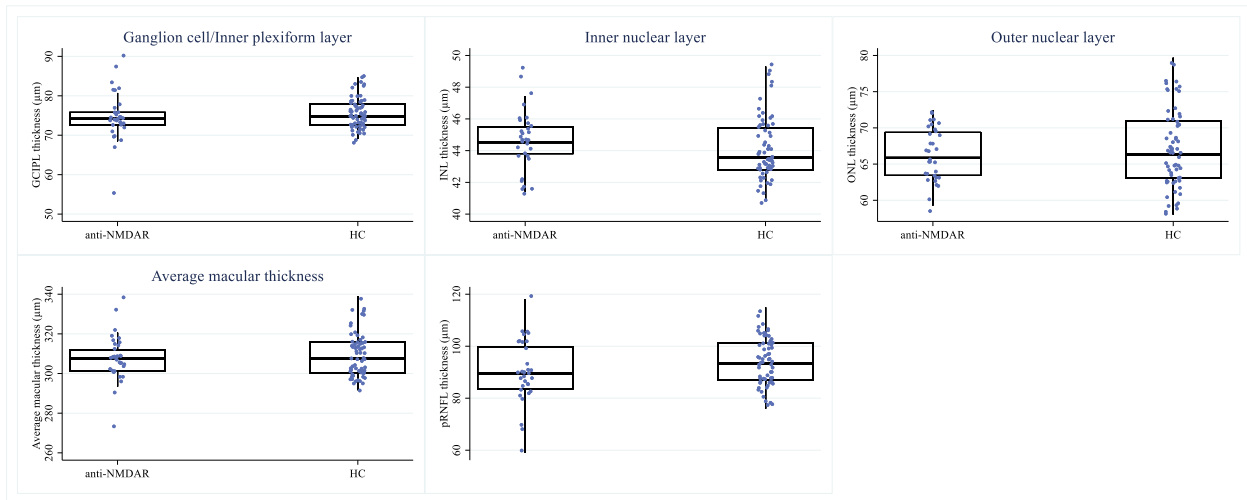

Boxplots demonstrating the lack of differences in OCT measured A. GCIPL thickness, B. INL thickness, C. ONL thickness, D. AMT thickness, and E. pRNFL thickness between anti-NMDAR and HC.
